# Supplementary material
Source: PubMed Central journal article supplement (PMC1303205)
Supplement: biophysj_85_2_828__1.pdf [file biophysj_85_2_828__1.pdf]

**Movie 1:** Simulation of a swimming spiroplasma. We solved (B.4-B.7,B.9) using the numerical method in **Appendix D**. The parameters for (B.8) for this run were  $\kappa_0 = 3.84\mu\text{m}^{-1}$ ,  $\alpha = 0.4$ ,  $\gamma = 5$ ,  $\phi = \pi/2$ ,  $\Omega_0 = 3.0\mu\text{m}^{-1}$ , and  $\beta = 0.26$ .

**Movie 2:** Simulation of a bending wave. A 2 dimensional analog of (B.4-B.7,B.9) were solved using a Crank-Nicholson routine. This provides a possible mechanism that can drive surface waves, and therefore propulsion, in *Synechococcus* and *Myxococcus xanthus*.
